## ACKNOWLEDGMENT

The Editor-in-Chief and the Editors of ANESTHESIOLOGY would like to thank the following individuals for their participation in the editorial review process. Their contribution is sincerely appreciated.

- Basem B. Abdelmalak, M.D.  
Anthony Absalom, M.B., Ch.B., F.R.C.A.  
Jouni Ahonen, M.D.  
Paul H. Alfillle, M.D.  
Michael T. Alkire, M.D.  
T. Anthony Anderson, Ph.D., M.D.  
Dean B. Andropoulos, M.D.  
Martin S. Angst, M.D.  
James Anton, M.D.  
Katherine W. Arendt, M.D.  
William M. Armstead, Ph.D.  
Karim Asehnoune, M.D., Ph.D.  
Frederic Aubrun, M.D., Ph.D.  
John George Augoustides, M.D., F.A.S.E.  
Edwin Avery, M.D.  
Takao Ayuse, D.D.S., Ph.D.  
Douglas R. Bacon, M.D., M.A.  
Angela M. Bader, M.D., M.P.H.  
Safwan Badr, M.D.  
Aranya Bagchi, M.D.  
James M. Bailey, M.D., Ph.D.  
Charles M. Balch, M.D.  
Jane C. Ballantyne, M.D., F.R.C.A.  
Matthew I. Banks, Ph.D.  
Raquel Bartz, M.D.  
Jan H. Baumert, M.D., Ph.D.  
W. Scott Beattie, M.D., Ph.D.  
Pierre Beaulieu, M.D., Ph.D.  
Inna Belfer, M.D., Ph.D.  
Honorio T. Benzon, M.D.  
Charles B. Berde, M.D., Ph.D.  
Mitchell F. Berman, M.D., M.P.H.  
Lorenzo Berra, M.D.  
Edward Bertaccini, M.D.  
Philip E. Bickler, M.D., Ph.D.  
Luca M. Bigatello, M.D.  
Edward Bittner, M.D., Ph.D.  
Kenneth D. Bloch, M.D.  
Robert I. Block, Ph.D.  
James M. Blum, M.D.  
Simon C. Body, M.B., Ch.B., M.P.H.  
Zeljko J. Bosnjak, Ph.D.  
Barbara W. Broom, M.D.  
Birgitte Brandstrup, M.D., Ph.D.  
Timothy J. Brennan, Ph.D., M.D.  
Gary Jay Brenner, M.D., Ph.D.  
Jonathan Brooks, Ph.D.  
Robert H. Brown, M.D., M.P.H.  
Emery N. Brown, M.D., Ph.D.  
Christian S. Bruells, M.D.  
Sorin J. Brull, M.D., F.C.A.R.C.S.I. (Hon)  
Gregory Lyle Bryson, F.R.C.P.C.  
Luc Buée, Ph.D.  
Donal J. Buggy, M.D., M.Sc.  
Nigel W. Bunnett, Ph.D.  
Alexander J. Butwick, M.B.B.S., F.R.C.A., M.S.  
Catherine Cahill, Ph.D.  
Ian Calder, F.R.C.A.  
Patrizia Campolongo, Ph.D., Pharm.D.  
Maxime Cannesson, M.D., Ph.D.  
Xavier Capdevila, M.D., Ph.D.  
Daniel Barry Carr, M.D.  
Ian Richard Carroll, M.D., M.S. Epi.  
Juan P. Cata, M.D.  
Davide Cattano, M.D., Ph.D.  
Stephen Chambers, M.B., Ch.B., M.D.  
Vincent W. S. Chan, M.D.  
Wei Chao M.D., Ph.D.  
James Frederick Cheeseman, Ph.D.  
Lucy L. Chen, M.D.  
Jianguo Cheng, M.D., Ph.D.  
Hovig Chitilian, M.D.  
Bernard P. Cholley, M.D., Ph.D.  
Frances Chung, M.B.B.S., F.R.C.P.C.  
Casper Claudius, M.D.  
Miguel A. Cobas, M.D.  
Edmond Cohen, M.D.  
Steven Paul Cohen, M.D.  
Jonathan B. Cohen, Ph.D.  
Daniel J. Cole, M.D.  
Alain Combes, M.D., Ph.D.  
Xavier Combes, M.D.  
Christopher W. Connor, M.D., Ph.D.  
Jeffrey B. Cooper, Ph.D.  
Richard M. Cooper, M.D., F.R.C.P.C.  
Joseph F. Cotton, M.D., Ph.D.  
Robin G. Cox, M.B., B.S.  
Gregory Crosby, M.D.  
Marie E. Csete, M.D., Ph.D.  
Colm Cunningham, Ph.D.  
Gerard F. Curley, M.B., Ph.D.  
Fitz-Roy E. Curry, Ph.D.  
Souhayl Dahmani, M.D., Ph.D.  
Derek S. Damron, Ph.D.  
Gildasio S. de Oliveira, Jr., M.D., M.S.C.I.  
Nicolas de Prost, M.D., Ph.D.  
Jan De Witte, M.D.  
Vincent Degos, M.D., Ph.D.  
Giorgio Della Rocca, M.D.  
Viola Dengler, M.D., Ph.D.  
Adrien E. Desjardins, Ph.D.  
George Despotis, M.D.  
Philip J. Devereaux, M.D., Ph.D.  
Pascale Dewachter, M.D., Ph.D.  
Franklin Dexter, M.D., Ph.D.  
Gilles Dhonneur, M.D., Ph.D.  
Anthony H. Dickenson, B.Sc., Ph.D.  
Wulf Dietrich, M.D., Ph.D.  
James P. Dilger, Ph.D.  
Justin B. Dimick, M.D., M.P.H.  
James Anthony DiNardo, M.D.  
Karen B. Domino, M.D., M.P.H.  
Brian S. Donahue, M.D., Ph.D.  
François Donati, Ph.D., M.D.  
Anthony G. Doufas, M.D., Ph.D.  
Tomas Drabek, M.D., Ph.D.  
David R. Drover, M.D.  
James Duffin, Ph.D.  
Andra E. Duncan, M.D.  
Herve Dupont, M.D., Ph.D.  
Marcel E. Durieux, M.D., Ph.D.  
Richard P. Dutton, M.D.  
Robert H. Dworkin, Ph.D.  
Jason Dwyer, Ph.D.  
Sunil Eappen, M.D.  
Michael P. Eaton, M.D.  
Roderic G. Eckenhoff, M.D.  
Tobias Eckle, M.D., Ph.D.  
Talmage D. Egan, M.D.  
Edmond I Eger, II, M.D.  
Mohammad I. El-Orbany, M.D.  
Douglas J. Eleveld, M.Eng.  
John E. Ellis, M.D.  
Monique P. Elseviers, Ph.D.  
Nichole Emerson, B.S.  
Lars I. Eriksson M.D., Ph.D.  
Alain Eschalier, M.D.  
Alex S. Evers, M.D.  
Lisa W. Faberowski, M.D.  
Ehab Farag, M.D., F.R.C.A.  
David Faraoni, M.D., F.C.C.P.  
John R. Feiner, M.D.  
Jean-Luc Fellahi, M.D., Ph.D.  
Niall Ferguson, M.D., M.Sc.  
Roger B. Fillingim, Ph.D.  
Heidrun Fink, M.D.  
Mitchell P. Fink, M.D.  
Dennis M. Fisher, M.D.  
Marc Flajolet, M.D.  
Patrice Forget, M.D., Ph.D.  
Stuart A. Forman, M.D., Ph.D.  
Steven M. Frank, M.D.  
Nicholas P. Franks, F.R.C.A., F.Med.Sci.  
Michael Frass, M.D.  
Gyorgy Frendl, M.D.  
Gerhard Fritsch, M.D.  
Thomas Fuchs-Buder, M.D.  
Axel Fudickar, M.D.  
Marcelo Gama de Abreu, M.D., Ph.D.  
Pedro L. Gambús, M.D.  
Tong J. Gan, M.D., M.H.S.  
Luna Gargani, M.D.  
Lene H. Garvey, M.D., Ph.D.  
Luciano Gattinoni, M.D., F.R.C.P.  
Simon Gelman, M.D.  
Peter Gerner, M.D.  
Louis C. Gerstenfeld, Ph.D.  
Rona G. Giffard, Ph.D., M.D.  
Ian Gilron, M.D., M.Sc.  
Tony Gin, M.D.  
Yehuda Ginosar, B.Sc., M.B.B.S.  
Laurent Gilles Glance, M.D.  
David Brian Glick, M.D., M.B.A.  
Peter Goldstein, M.D.  
Cheng-Xin Gong, M.D.  
Vijaya N. R. Gottumukkala, M.B., B.S., M.D.  
Stanislas Grassin-Delyle, Pharm.D., Ph.D.  
John J. Greer, M.D.  
George A. Gregory, M.D.  
Robert Greif, M.D., M.M.E.  
Hilary Peter Grocott, M.D., F.R.C.P.C.  
Michael A. Gropper, M.D., Ph.D.  
Eric R. Gross, M.D., Ph.D.  
Jeffrey B. Gross, M.D.  
Martin Grossherr, M.D., D.E.A.A.  
Oliver Grottke, M.D., Ph.D.  
Padma Gulur, M.D.  
Kalpna Gupta, Ph.D.  
Anil Gupta, M.D., F.R.C.A.  
Nina A. Guzzetta, M.D.

- Anja Haase-Fielitz, Pharm.D.  
 Satoshi Hagihira, M.D., Ph.D.  
 Robert G. Hahn, M.D., Ph.D.  
 Tim G. Hales, Ph.D., F.R.C.A.  
 Guy S. Haller, M.D., Ph.D.  
 Ruquan Han, M.D., Ph.D.  
 Michael F. Haney, M.D., Ph.D.  
 Samuel Hankins, M.D.  
 Erin C. Hanlon, Ph.D.  
 Jonathan Grant Hardman, B.Med.Sci., B.M.  
 R. Adron Harris, Ph.D.  
 Richard E. Harris, Ph.D.  
 David N. F. Harris, M.D.  
 Brian P. Head, M.S., Ph.D.  
 James R. Hebl, M.D.  
 Paul M. Heerd, M.D., Ph.D.  
 Mary M. Heinricher, Ph.D.  
 Kevin Hellman, Ph.D.  
 Jan F. A. Hendrickx, M.D., Ph.D.  
 Thomas K. Henthorn, M.D.  
 Brian D. Hesler, M.D.  
 Dean Hess, Ph.D., R.R.T.  
 Hideyuki Higuchi, M.D.  
 David Russell Hillman, M.D.  
 Sabine Himmelseher, M.D.  
 Ion A. Hobai, M.D., Ph.D.  
 Andreas Hoeft, M.D., Ph.D.  
 Kirk J. Hogan, M.D.  
 Charles W. Hogue, Jr., M.D.  
 Markus W. Hollmann, M.D., Ph.D.  
 Harriet W. Hopf, M.D.  
 Philip M. Hopkins, M.B., B.S., M.D.  
 Yuuichi Hori, M.D., Ph.D.  
 Cyrill Hornuss, M.D.  
 Guochang Hu, M.D., Ph.D.  
 Rolf D. Hubmayr, M.D.  
 William E. Hurford, M.D.  
 Fumito Ichinose, M.D., Ph.D.  
 Brian Michael Iffeld, M.D., M.S.  
 Charles Inturrisi, Ph.D.  
 Michael Garnet Irwin, M.B., Ch.B., M.D.  
 Teruhiko Ishikawa, M.D.  
 Bruce R. Ito, Ph.D.  
 Samir Jaber, M.D., Ph.D.  
 Carl-Johan Jakobsen, M.D.  
 Ville Jantti, M.D., Ph.D.  
 Michael Jarvis, Ph.D.  
 Vesna Jevtovic-Todorovic, M.D., Ph.D.  
 Roger A. Johns, M.D.  
 Ken B. Johnson, M.D.  
 Daniel W. Johnson, M.D.  
 Ritva Jokela, M.D., Ph.D.  
 Malin Jonsson Fagerlund, M.D., Ph.D.  
 Girish P. Joshi, M.D., M.B., B.S.  
 Shailendra Joshi, M.D.  
 Jasmina Jovanovic, Ph.D.  
 Nicole P. Juffermans, M.D., Ph.D.  
 Boris Jung, M.D., Ph.D.  
 Robert M. Kacmarek, Ph.D., R.R.T.  
 Zeev N. Kain, M.D., M.B.A.  
 Eija Kalso, M.D.  
 Suzanne Beth Karan, M.D.  
 Keyvan Karkouti, M.D., M.Sc.  
 Ira S. Kass, Ph.D.  
 Brian P. Kavanagh, M.B., B.Sc., M.R.C.P.  
 Max B. Kelz, M.D., Ph.D.  
 David J. Kennedy, M.D.  
 Judy R. Kersten, M.D.  
 Arshad Khan, Ph.D.  
 Evan D. Kharasch, M.D., Ph.D.  
 Hanspeter E. Killer, M.D.  
 David R. King, M.D.  
 Eric Kipnis, M.D., Ph.D.  
 Erik B. Kistler, M.D., Ph.D.  
 Masayuki Kobayashi, D.D.S., Ph.D.  
 Eberhard F. Kochs, M.D.  
 W. Andrew Kofke, M.D., M.B.A.  
 Aaron F. Kopman, M.D.  
 Vincent J. Kopp, M.D.  
 Yoshifumi Kotake, M.D., Ph.D.  
 Eva Kottenberg, M.D.  
 Gabor Kovacs, M.D., Ph.D.  
 Michael Seltz Kristensen, M.D.  
 Morgens Kroigaard, M.D.  
 Norifumi Kuratani, M.D., Ph.D.  
 Andrea Kurz, M.D.  
 Wai-Meng Kwok, Ph.D.  
 Jörn Lötsch, M.D.  
 John G. Laffey, M.D., F.C.A.I.  
 Franco Laghi, M.D.  
 Robert H. LaMotte, Ph.D.  
 Joseph Lane, M.D.  
 Jeroen D. Langereis, Ph.D.  
 Olivier Langeron, M.D., Ph.D.  
 Marilyn Green Larach, M.D., F.A.A.P.  
 Jan Larsson, M.D., Ph.D.  
 Sigismond Lasocki, M.D., Ph.D.  
 H. Thomas Lee, M.D., Ph.D.  
 Jae-Woo Lee, M.D.  
 Sang Chul Lee, M.D., Ph.D.  
 Lorri A. Lee, M.D.  
 Chingmuh Lee, M.D.  
 Jean-Yves Lefrant, M.D., Ph.D.  
 Hendrikus Lemmens, Ph.D., M.D.  
 Marc Leone, M.D., Ph.D.  
 Jerrold Lerman, M.D., F.R.C.P.C.  
 Adam B. Lerner, M.D.  
 Thomas Lescot, M.D., Ph.D.  
 Kate Leslie, M.B.B.S., M.D.  
 Jacqueline M. Leung, M.D., M.P.H.  
 L. Stan Leung, Ph.D.  
 Bruno Levy, M.D., Ph.D.  
 Bruce D. Levy, M.D.  
 J. Lance Lichtor, M.D.  
 Cynthia A. Lien, M.D.  
 Angela K.M. Lipshutz, M.D., M.P.H.  
 Renyu Liu, M.D., Ph.D.  
 Spencer S. Liu, M.D.  
 Andreas W. Loepke, M.D., Ph.D.  
 Mark R. Looney, M.D.  
 Torsten Loop, M.D.  
 Carl Lynch, III, M.D., Ph.D.  
 Daqing Ma, M.D., Ph.D.  
 Alex Macario, M.D., M.B.A.  
 M. Bruce MacIver, M.Sc., Ph.D.  
 G. Burkhard Mackensen, M.D., Ph.D.  
 Jeff E. Mandel, M.D., M.S.  
 Gerard Raymond Manecke, Jr., M.D.  
 Tanja Manser, Ph.D.  
 Peter Marhofer, M.D.  
 Edward R. Mariano, M.D., M.A.S. (Clinical Research)  
 John J. Marini, M.D.  
 Thomas Jeffrey Martin, Ph.D.  
 Bonnie J. Martin-Harris, M.D.  
 Katherine T. Martucci, Ph.D.  
 J. A. Jeevendra Martyn, M.D., F.R.C.A.  
 Anatoly E. Martynyuk, Ph.D., D.Sc.  
 Kenichi Masui, M.D., Ph.D.  
 Joseph P. Mathew, M.D.  
 Naoyuki Matsuda, M.D., Ph.D.  
 Bryan G. Maxwell, M.D., M.P.H.  
 Mervyn Maze, M.B., Ch.B.  
 Robert J. McCarthy, Pharm.D.  
 David L. McDonagh, M.D.  
 Steffen Meiler, M.D.  
 Paul Michel Mertes, M.D., Ph.D.  
 Patrick Meybohm, M.D.  
 Jill M. Mhyre, M.D.  
 Éric Milot, Ph.D.  
 Rebecca D. Minehart, M.D.  
 Richard D. Minshall, Ph.D.  
 Simon Mitchell, M.B., Ch.B., F.A.N.Z.C.A.  
 Toshiki Mizobe, M.D., Ph.D.  
 Serge Molliex, M.D., Ph.D.  
 Terri G. Monk, M.D.  
 Laurel Elaine Moore, M.D.  
 Krishna Moorthy, M.S., M.D., F.R.C.S.  
 Iain Keith Moppett, D.M., F.R.C.A.  
 Richard Moreau, M.D.  
 Timothy E. Morey, M.D.  
 Phil G. Morgan, M.D.  
 Jeremi Mountjoy, M.D.  
 Jochen Daniel Muehlschlegel, M.D., M.M.Sc.  
 Glenn S. Murphy, M.D.  
 Edward Murphy, M.D., M.P.H.  
 David J. Murray, M.D.  
 Guido Musch, M.D.  
 Paul S. Myles, M.B., B.S., M.P.H., M.D.  
 Michael G. Mythen, M.B.B.S., F.R.C.A., M.D.  
 Yasufumi Nakajima, M.D., Ph.D.  
 Paolo Navalesi, M.D.  
 Vladimir Nekhendzy, M.D.  
 Warwick Dean Ngan Kee, M.B.Ch.B., F.A.N.Z.C.A., M.D.  
 Vance G. Nielsen, M.D.  
 Alastair Forbes Nimmo, M.B.Ch.B., F.R.C.A.  
 Takashi Nishino, M.D.  
 Vicki E. Noble, M.D.  
 Ala Nozari, M.D., Ph.D.  
 Saad Nseir, M.D.  
 Niels Vidiendal Olsen, M.D., D.M.Sc.  
 Fredrick K. Orkin, M.D., M.B.A., S.M.  
 Alexandre Ouattara, M.D., Ph.D.  
 Nathan L. Pace, M.D., M.Stat.  
 Arvind Palanisamy, M.D., F.R.C.A.  
 Craig M. Palmer, M.D.  
 Peter H. Pan, M.D.  
 Wei Pan, M.D.  
 Pratik Pandharipande, M.D., M.S.C.I.  
 Manuel C. Pardo, M.D.  
 Wulf Paschen, Ph.D.  
 Hemal H. Patel, Ph.D.  
 Sachin Patel, M.D., Ph.D.  
 Amol Patwardhan, M.D., Ph.D.  
 Catherine Paugam-Burtz, M.D., Ph.D.  
 James E. Paul, M.D., M.Sc., F.R.C.P.C.

Jean-Francois Payen, M.D., Ph.D.  
 Didier Payen, M.D., Ph.D.  
 Matthew Pearn, M.D.  
 Misha Perouansky, M.D.  
 Antti Pertovaara, M.D., Ph.D.  
 Antonio Pesenti, M.D.  
 Christopher Michael Peters, Ph.D.  
 Cathleen Peterson-Layne, Ph.D., M.D.  
 Philip John Peyton, M.D., Ph.D., M.B.B.S.  
 Evan G. Pivalizza, M.D.  
 Emmanuel Planel, Ph.D.  
 Mihai Victor Podgoreanu, M.D.  
 Gary M. Pollack, Ph.D.  
 Arun Prakash, M.D., Ph.D.  
 Benedikt Preckel, M.D., Ph.D.  
 Theodore J. Price, Ph.D.  
 Alexander Proekt, M.D., Ph.D.  
 Kane O. Pryor, M.D.  
 Patrick L. Purdon, Ph.D.  
 Sadeq A. Quraishi, M.D., M.H.A.  
 Johan Raeder, M.D., Ph.D.  
 Douglas E. Raines, M.D.  
 Satya Krishna Ramachandran, M.D., F.R.C.A.  
 Lars S. Rasmussen, M.D., Ph.D.  
 Richard Rauck, M.D.  
 Aeyal Raz, M.D., Ph.D.  
 David L. Reich, M.D.  
 Mark J. Rice, M.D.  
 Kate Richard, M.D.  
 Philippe Richebé, M.D., Ph.D.  
 Bernhard J. Riedel, M.B.Ch.B., M.Med.  
 Matthias L. Riess, M.D., Ph.D.  
 David Ring, M.D., Ph.D.  
 Cyril Rivat, Ph.D.  
 Reitze Rodseth, F.C.A.(S.A.)  
 Mark D. Rollins, M.D., Ph.D.  
 E. Alfonso Romero-Sandoval, M.D., Ph.D.  
 Luis Romundstad, M.D.  
 Richard W. Rosenquist, M.D.  
 Carl E. Rosow, M.D., Ph.D.  
 Rolf Rossaint, M.D.  
 Steven Roth, M.D.  
 Jean-Jacques Rouby, M.D., Ph.D.  
 Damien Roux, M.D., Ph.D.  
 Uwe Rudolph, M.D.  
 James A. Russell, M.D.  
 Ian F. Russell, M.B., Ch.B., F.R.C.A.  
 W. John Russell, M.D., Ph.D., F.A.N.Z.C.A.  
 Leif Saager, Dr. med.  
 Todd C. Sacktor, M.D.  
 Paul Sadleir, M.B.B.S., F.A.N.Z.C.A.  
 Jacqueline Sagen, Ph.D., M.B.A.  
 Jeffrey W. Sall, M.D., Ph.D.  
 Charles-Marc Samama, M.D., Ph.D.  
 Elisabeth Sandberg, Ph.D.  
 Robert D. Sanders, M.B.B.S., F.R.C.A.  
 Constantine D. Sarantopoulos, M.D., Ph.D.  
 Yasushi Satoh, Ph.D.  
 Roberto Scatena, M.D.  
 Scott A. Schartel, D.O.  
 Gregory Scherrer, Ph.D.  
 Martin Schmelz, M.D.  
 Mark S. Schreiner, M.D.  
 Mark Edwin Schroeder, M.D.  
 Armin Schubert, M.D., M.B.A.  
 Marcus J. Schultz, M.D., Ph.D.  
 Christian M. Schulz, M.D.  
 Mark Anthony Schumacher, Ph.D., M.D.  
 Phillip E. Scuderi, M.D.  
 John Sear, M.B.B.S., Ph.D.  
 Steven L. Shafer, M.D.  
 Muhammad I. Shaikh, M.D., Ph.D.  
 Aryeh Shander, M.D., F.C.C.M.  
 Stanton Shernan, M.D.  
 Edward R. Sherwood, M.D., Ph.D.  
 Jae-Kwang Shim, M.D., Ph.D.  
 Linda Shore-Lesserson, M.D.  
 Jeffrey H. Silber, M.D., Ph.D.  
 Jeffrey H. Silverstein, M.D.  
 Patrick Sips, Ph.D.  
 Nikolaos J. Skubas, M.D.  
 Robert N. Sladen, M.D.  
 Peter D. Slinger, M.D.  
 Arthur Smerling, M.D.  
 Richard M. Smiley, M.D., Ph.D.  
 Martin Smith, M.B.B.S., F.R.C.A.  
 Ashley J. Smuder, Ph.D.  
 J. Robert Sneyd, M.D., F.R.C.A.  
 Gretchen Snyder, Ph.D.  
 Ken Solt, M.D.  
 James Michael Sonner, M.D.  
 Sulpicio G. Soriano, M.D.  
 James Spaeth, M.D.  
 Donat Rudolf Spahn, M.D., F.R.C.A.  
 Claudia D. Spies, M.D.  
 Christina Marie Spofford, M.D., Ph.D.  
 Creed M. Stary, M.D., Ph.D.  
 Randolph H. Steadman, M.D.  
 Jacob Steinmetz, M.D., Ph.D.  
 Marjorie Podraza Stiegler, M.D.  
 Bradley Stone, M.D.  
 David A. Story, M.B.B.S., B.Med.Sci., M.D.  
 Robert A. Strickland, M.D.  
 Michel M. R. F. Struys, M.D., Ph.D.  
 Eckehard A. E. Stuth, M.D.  
 Lena S. Sun, M.D.  
 Michael Sury, F.R.C.A., Ph.D.  
 Christer H. Svensen, M.D., Ph.D.  
 Madhav Swaminathan, M.D., F.A.S.E., F.A.H.A.  
 BobbieJean Sweitzer, M.D.  
 Peter Szmuk, M.D.  
 Andreas H. Taenzer, M.D., M.S.  
 Daniel Talmor, M.D., M.P.H.  
 Kenichi A. Tanaka, M.D., M.Sc.  
 Pei Tang, Ph.D.  
 Yuan-Xiang Tao, M.D., Ph.D.  
 Benoit Tavernier, M.D., Ph.D.  
 Richard Teplick, M.D.  
 Niccolo Terrando, Ph.D.  
 Nicolas Terzi, M.D., Ph.D.  
 Antoine Tesniere, M.D., Ph.D.  
 Lorenz G. Theiler, M.D.  
 Oliver Michel Theusinger, M.D.  
 Slobodan M. Todorovic, M.D., Ph.D.  
 Lawrence Toll, Ph.D.  
 Antoni Torres, M.D., Ph.D.  
 Nicolas Tournier, M.D.  
 James R. Trudell, Ph.D.  
 Lawrence C. Tsen, M.D.  
 Ban C. H. Tsui, M.Sc., M.D.  
 Ricardo Vallejo, M.D.  
 Hugo Van Aken, M.D., Ph.D.  
 Rudy Van Coster, M.D., Ph.D.  
 Philippe J. Van der Linden, M.D., Ph.D.  
 Gail A. Van Norman, M.D.  
 André van Zundert, M.D., Ph.D., F.R.C.A.  
 Lionel J. Velly, M.D.  
 Robert A. Veselis, M.D.  
 Thomas R. Vetter, M.D., M.P.H.  
 Marcos Francisco Vidal Melo, M.D., Ph.D.  
 Jean-Louis Vincent, M.D., Ph.D.  
 Benoit Vivien, M.D., Ph.D.  
 Laszlo Vutskits, M.D., Ph.D.  
 Gebhard Wagener, M.D.  
 Michael Wagner, M.D., Ph.D.  
 Stefan Wagner, M.D.  
 Arthur W. Wallace, M.D., Ph.D.  
 Mark S. Wallace, M.D.  
 Kendall B. Wallace, Ph.D.  
 Ging Kuo Wang, Ph.D.  
 Yibin Wang, Ph.D.  
 David O. Warner, M.D.  
 Mark A. Warner, M.D.  
 Jason Wasiak, Ph.D.  
 Mehernoor F. Watcha, M.D.  
 Jonathan H. Waters, M.D.  
 Richard B. Weiskopf, M.D.  
 Ian James Welsby, M.B.B.S.  
 Matthew Whiteman, Ph.D.  
 Gina Whitney, M.D.  
 Robert A. Whittington, M.D.  
 Harvey J. Woehlck, M.D.  
 Cynthia A. Wong, M.D.  
 Christopher L. Wu, M.D.  
 Hannah Wunsch, M.D., M.Sc.  
 Zhengyuan Xia, M.D., Ph.D.  
 Zhongcong Xie, M.D., Ph.D.  
 Tony L. Yaksh, Ph.D.  
 Peter J. Young, M.D., F.R.C.A., M.B., Ch.B.  
 Sloan C. Youngblood, M.D.  
 Warren M. Zapol, M.D.  
 Michael Zaugg, M.D., M.B.A.  
 Jun-Ming Zhang, M.D., M.Sc.  
 Li-Ming Zhang, M.D.  
 John H. Zhang, M.D., Ph.D.  
 Jie Zhou, M.D., M.B.A.  
 Mark H. Zornow, M.D.  
 Zhiyi Zuo, M.D., Ph.D.
